# Supplementary material for: Cartesian coordinates scaffold stable spatial perception over time
Source: PubMed Central journal article supplement — J Vis. 2022 Jul 20;22(8):13. doi: 10.1167/jov.22.8.13 (PMC9315070; doi:10.1167/jov.22.8.13), 2022-07-20
Supplement: jovi-22-8-13_s001.pdf [file jovi-22-8-13_s001.pdf]

**Supplementary table 1**

**Mixed effect model comparison results of Experiments 1 & 4 ( $\Delta$ AICc relative to the best model on each axis)**

|              |                  |                             | <b>Constant</b> | <b>SD</b> | <b>LinearCT</b> | <b>Complex CT</b> | <b>SD+ComplexCT</b> |
|--------------|------------------|-----------------------------|-----------------|-----------|-----------------|-------------------|---------------------|
| <b>Exp 1</b> | <b>Cartesian</b> | <b>x</b>                    | 8945.4          | 4833.4    | 1740.6          | 241.5             | 0                   |
|              |                  | <b>y</b>                    | 11372.5         | 5409.4    | 1148.5          | 348.0             | 0                   |
|              | <b>Polar</b>     | <b><math>\rho</math></b>    | 3807.7          | 1006.9    | 347.1           | 362.6             | 0                   |
|              |                  | <b><math>\varphi</math></b> | 249.4           | 0         |                 |                   |                     |
| <b>Exp 4</b> | <b>Cartesian</b> | <b>x</b>                    | 9062.5          | 5182.6    | 2395.1          | 107.3             | 0                   |
|              |                  | <b>y</b>                    | 14285.3         | 7226.7    | 1176.1          | 201.0             | 0                   |
|              | <b>Polar</b>     | <b><math>\rho</math></b>    | 4662.6          | 2476.0    | 268.1           | 85.8              | 0                   |
|              |                  | <b><math>\varphi</math></b> | 68.2            | 0         |                 |                   |                     |

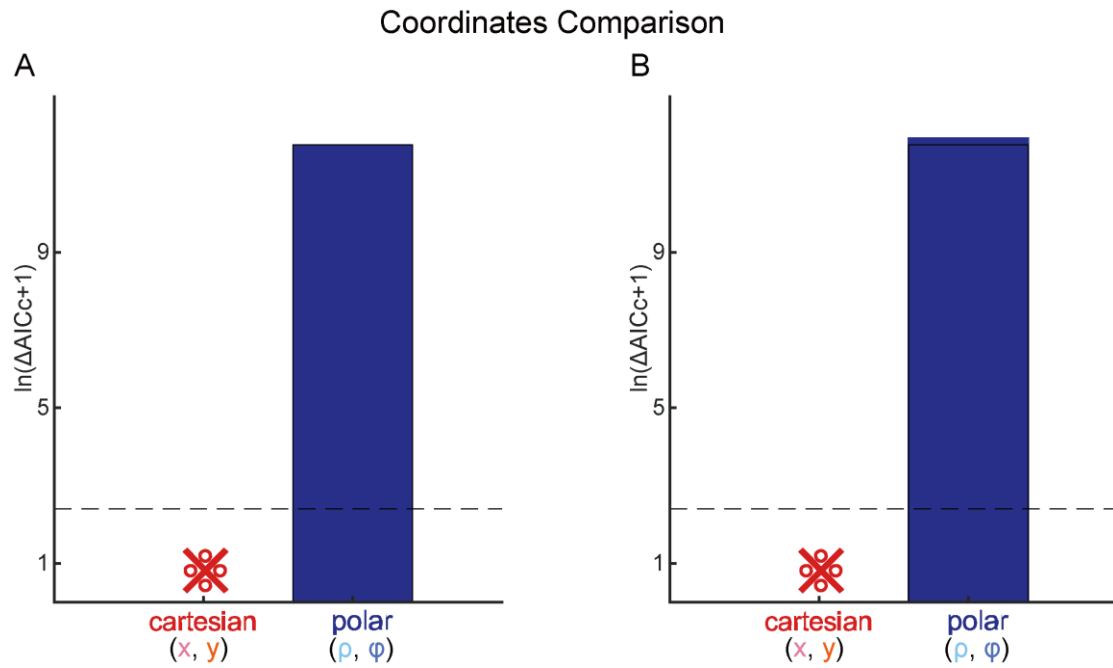

**Supplementary Figure 1. Cartesian coordinates outperformed polar coordinates using mixed effect model (Experiment 1&4)** Model comparison between Cartesian and Polar coordinates of **(A)** Experiment 1 and **(B)** Experiment 4. The dashed line denotes threshold (log-transition of  $\Delta AICc = 10$ ).
